# Supplementary material
Source: PubMed Central journal article supplement (PMC4331126)
Supplement: NIHMS658790-supplement-supp_legends.pdf [file NIHMS658790-supplement-supp_legends.pdf]

**Supplemental Fig. 1.** NF2-deficient cells were treated with 100nM and 1000nM NXD30001 *in vitro* and the apoptotic cells were visualized by fluorescent microscopy after fluorometric TUNEL assay.

**Supplemental Fig. 2.** Global transcriptome profiling of NXD30001 efficacy. **A,** Total RNA was isolated from vehicle-treated or NXD30001-treated sets of ESC-FC1801 cells for NGS. Morphological changes (upper panel) and the growth suppression (lower panel) in the ESF-FC1801 cells *in vitro* and a tumor *in vivo*. **B,** Overview of Cufflinks' gene expression analysis on 35,604 gene loci. **C,** Differential expression of HSP90 interacting proteins. The abundance of transcripts expressed in fragments per kilobase of exon per million fragments mapped (FPKM) was dot-plotted before versus after the drug treatment. *In vitro*, 58 transcripts were up-regulated (red) and 113 were down-regulated (green), whereas 37 transcripts were up-regulated and 30 were down-regulated *in vivo* by more than two-fold.
